# Supplementary material for: The Genome Sequence of Saccharomyces eubayanus and the Domestication of Lager-Brewing Yeasts
Source: PubMed Central journal article supplement — Mol Biol Evol. 2015 Aug 11;32(11):2818–31. doi: 10.1093/molbev/msv168 (PMC4651232; doi:10.1093/molbev/msv168), 2015-08-11
Supplement: supp_msv168_SupplementaryTables.pdf [file supp_msv168_SupplementaryTables.pdf]

**Table S1**

Nucleotide diversity between lager-brewing yeast genomes and their parental strains

|                                   | Saaz   |        |               | Frohberg |        |               |
|-----------------------------------|--------|--------|---------------|----------|--------|---------------|
|                                   | N*dN   | S*dS   | all           | N*dN     | S*dS   | all           |
| <i>S. cerevisiae</i> (S288c)      | 2268.4 | 4279.7 | 6548.1        | 2196.2   | 4129.6 | 6325.8        |
| Lager- <i>S. cerevisiae</i>       | 2944.8 | 4415.6 | 7360.4        | 2362.2   | 3954.4 | 6316.6        |
| Total changes between lineages    | 5213.2 | 8695.3 | 13908.5       | 4558.4   | 8084.0 | 12642.4       |
| % of bp changed between lineages  | 0.22%  | 0.99%  | 0.43%         | 0.20%    | 0.93%  | 0.40%         |
| % identity between lineages       | 99.78% | 99.01% | <b>99.57%</b> | 99.80%   | 99.07% | <b>99.60%</b> |
| changes per 1000 bp               | 2.2    | 9.9    | 4.3           | 2.0      | 9.3    | 4.0           |
| Average # of differences per gene | 2.30   | 3.83   | 6.13          | 2.01     | 3.56   | 5.57          |

|                                   | Saaz   |        |               | Frohberg |        |               |
|-----------------------------------|--------|--------|---------------|----------|--------|---------------|
|                                   | N*dN   | S*dS   | all           | N*dN     | S*dS   | all           |
| <i>S. eubayanus</i> (FM1318)      | 1232.3 | 3880.3 | 5112.6        | 1224.2   | 3827.0 | 5051.2        |
| Lager- <i>S. eubayanus</i>        | 3835.8 | 5463.8 | 9299.6        | 3783.2   | 5430.6 | 9213.8        |
| Total changes between lineages    | 5068.1 | 9344.1 | 14412.2       | 5007.4   | 9257.6 | 14265.0       |
| % of bp changed between lineages  | 0.22%  | 1.06%  | 0.45%         | 0.22%    | 1.06%  | 0.45%         |
| % identity between lineages       | 99.78% | 98.94% | <b>99.55%</b> | 99.78%   | 98.94% | <b>99.55%</b> |
| changes per 1000 bp               | 2.2    | 10.6   | 4.5           | 2.2      | 10.6   | 4.5           |
| Average # of differences per gene | 2.23   | 4.12   | 6.35          | 2.21     | 4.08   | 6.29          |

|          | Total # nonsynonymous sites | Total # synonymous sites | Total # sites |
|----------|-----------------------------|--------------------------|---------------|
| Saaz     | 2324071                     | 881426                   | 3205497       |
| Frohberg | 2301842                     | 872845                   | 3174687       |

Total # of genes: 2268

N\*dN : estimated total number of nonsynonymous changes

S\*dS: estimated total number of synonymous changes

Saaz: Saaz lineage of lager-brewing yeasts

Frohberg: Frohberg lineage of lager-brewing yeasts

**Values discussed in the main text**

**Maltose utilization genes in *S. eubayanus* and lager-brewing yeasts**

**Table S2**

| <i>S. eubayanus</i> (FM1318)                                     |                                   |                                   |                                      |                           |
|------------------------------------------------------------------|-----------------------------------|-----------------------------------|--------------------------------------|---------------------------|
| Transporters                                                     | Location                          | Length (aa)                       | Closest <i>S. cerevisiae</i> homolog | Identity (%) <sup>a</sup> |
| <i>SeubMALT1</i>                                                 | ChrII –left arm (subtelomeric)    | 614                               | <i>MAL21</i>                         | 80.36                     |
| <i>SeubMALT2</i> <sup>H</sup>                                    | ChrV – right arm (subtelomeric)   | 614                               | <i>MAL31</i>                         | 82.19                     |
| <i>SeubMALT3</i> <sup>H</sup>                                    | ChrXIII – left arm (subtelomeric) | 615                               | <i>MAL31</i>                         | 85.15                     |
| Maltases                                                         | Location                          | Length (aa)                       | Closest <i>S. cerevisiae</i> homolog | Identity (%) <sup>a</sup> |
| <i>SeubIMA-A</i>                                                 | ChrII –left arm (subtelomeric)    | 590                               | <i>IMA1</i>                          | 90.49                     |
| <i>SeubIMA-B</i>                                                 | ChrV – right arm (subtelomeric)   | 590                               | <i>IMA1</i> and <i>IMA4</i>          | 92.19                     |
| <i>tSeubIMA-C</i>                                                | ChrV – right arm (subtelomeric)   | 510 (t)                           | <i>IMA2</i>                          | 92.14                     |
| <i>SeubMALS</i>                                                  | ChrV – right arm (subtelomeric)   | 586                               | <i>MAL32</i>                         | 84.76                     |
| <i>SeubIMA-D</i>                                                 | ChrXIII – left arm (subtelomeric) | 590                               | <i>IMA1</i>                          | 91                        |
| <i>tSeubIMA-E</i>                                                | ChrXVI – left arm (subtelomeric)  | 181 (t)                           | <i>IMA2</i>                          | 90.61                     |
| Regulators                                                       | Location                          | Length (aa)                       | Closest <i>S. cerevisiae</i> homolog | Identity (%) <sup>a</sup> |
| <i>SeubMAL63A</i>                                                | ChrV – right arm (subtelomeric)   | 472                               | <i>MAL63</i>                         | 73.83                     |
| <i>SeubMAL63B</i>                                                | ChrXIII – left arm (subtelomeric) | 471                               | <i>MAL63</i>                         | 84.68                     |
| <i>SeubMAL33A</i>                                                | ChrXIII – left arm (subtelomeric) | 462                               | <i>MAL33</i>                         | 70.72                     |
| <i>SeubMAL33B</i>                                                | ChrXVI – left arm (subtelomeric)  | 469                               | <i>MAL33</i>                         | 72.44                     |
| lager-brewing yeast-Saaz lineage (CBS 1513)                      |                                   |                                   |                                      |                           |
| Transporters                                                     | Length (aa)                       | Likely Origin                     | Closest homolog                      | Identity (%) <sup>a</sup> |
| <i>Lager – MTT1</i> <sup>M, H</sup><br>( <i>tSaazMAL61-C</i> )   | 370                               | inconclusive                      | <i>MAL61</i>                         | 92.14                     |
| <i>Lager – AGT1</i> <sup>M, H</sup><br>( <i>SaazMAL11-CA</i> )   | 611                               | inconclusive                      | <i>MAL11</i>                         | 85.9                      |
| <i>SaazMALT1-E</i>                                               | 595                               | inconclusive                      | <i>SeubMALT1</i>                     | 87.88                     |
| <i>SaazMALT2-E</i> <sup>I, H</sup>                               | 612                               | <i>S. eubayanus</i> <sup>S</sup>  | <i>SeubMALT2</i>                     | 89.18                     |
| <i>SaazMAL11-CB</i> <sup>I, H</sup>                              | 617                               | <i>S. cerevisiae</i>              | <i>MAL11</i>                         | 96.45                     |
| Maltases                                                         | Length (aa)                       | Likely Origin                     | Closest homolog                      | Identity (%) <sup>a</sup> |
| <i>tSaazMAL32-C</i>                                              | 542                               | <i>S. cerevisiae</i>              | <i>MAL32</i>                         | 99.63                     |
| <i>SaazIMA-CA</i>                                                | 590                               | <i>S. cerevisiae</i>              | <i>IMA2</i>                          | 99.83                     |
| <i>SaazIMA-EC</i>                                                | 596                               | <i>S. eubayanus</i> <sup>S</sup>  | <i>tSeubIMA-C</i>                    | 98.62                     |
| <i>SaazMALS-E</i>                                                | 586                               | <i>S. eubayanus</i> <sup>S</sup>  | <i>SeubMALS</i>                      | 95.21                     |
| <i>tSaazIMA-CB</i>                                               | 575                               | inconclusive                      | <i>IMA5</i>                          | 87.63                     |
| <i>SaazIMA-CC</i>                                                | 590                               | <i>S. cerevisiae</i> <sup>S</sup> | <i>IMA2</i>                          | 99.49                     |
| <i>SaazIMA-CD</i>                                                | 582                               | <i>S. cerevisiae</i> <sup>S</sup> | <i>IMA5</i>                          | 97.42                     |
| <i>tSaazIMA1-C</i>                                               | 166                               | <i>S. cerevisiae</i>              | <i>IMA1</i>                          | 100                       |
| <i>tSaazIMA-EA</i>                                               | 166                               | <i>S. cerevisiae</i>              | <i>SeubIMA-A (Ale)</i>               | 83.03 (>99) <sup>^</sup>  |
| Regulators                                                       | Length (aa)                       | Likely Origin                     | Closest homolog                      | Identity (%) <sup>a</sup> |
| <i>tSaazMAL63-C</i>                                              | 181                               | <i>S. cerevisiae</i>              | <i>MAL63</i>                         | 96.13                     |
| <i>SaazMAL13-C</i> <sup>I</sup>                                  | 474                               | <i>S. cerevisiae</i>              | <i>MAL13 (Ale)</i>                   | 99.58 (100) <sup>^</sup>  |
| <i>SaazMAL63-EA</i>                                              | 478                               | inconclusive                      | <i>SeubMAL63A</i>                    | 71.49                     |
| <i>SaazMAL33B-EB</i> <sup>I</sup>                                | 499                               | <i>S. eubayanus</i> <sup>S</sup>  | <i>SeubMAL33B</i>                    | 86.75                     |
| lager-brewing yeast-Frohberg lineage (W34/70)                    |                                   |                                   |                                      |                           |
| Transporters                                                     | Length (aa)                       | Likely Origin                     | Closest homolog                      | Identity (%) <sup>a</sup> |
| <i>Lager – MTT1</i> <sup>M, H</sup><br>( <i>WeihenMAL31-CA</i> ) | 616                               | inconclusive                      | <i>MAL31</i>                         | 90.72                     |
| <i>Lager – AGT1</i> <sup>M, H</sup><br>( <i>WeihenMAL11-CA</i> ) | 611                               | inconclusive                      | <i>MAL11</i>                         | 85.9                      |
| <i>WeihenMALT1-E</i>                                             | 595                               | inconclusive                      | <i>SeubMALT1</i>                     | 87.88                     |
| <i>WeihenMPH3-C</i> <sup>H</sup>                                 | 603                               | <i>S. cerevisiae</i>              | <i>MPH3</i>                          | 99.34                     |
| <i>tWeihenMAL31-CB</i> <sup>H</sup>                              | 363                               | <i>S. cerevisiae</i>              | <i>MAL31</i>                         | 96.69                     |
| <i>WeihenMALT2-E</i> <sup>I, H</sup>                             | 612                               | <i>S. eubayanus</i> <sup>S</sup>  | <i>SeubMALT2</i>                     | 89.18                     |
| <i>WeihenMAL11-CB</i> <sup>H</sup>                               | 617                               | <i>S. cerevisiae</i>              | <i>MAL11</i>                         | 96.45                     |
| Maltases                                                         | Length (aa)                       | Likely Origin                     | Closest homolog                      | Identity (%) <sup>a</sup> |
| <i>tWeihenMAL32-C</i>                                            | 573                               | <i>S. cerevisiae</i>              | <i>MAL32</i>                         | 99.48                     |
| <i>tWeihenIMA-EB</i>                                             | 338                               | <i>S. eubayanus</i>               | <i>SeubIMA-B</i>                     | 97.92                     |
| <i>WeihenIMA-CA</i>                                              | 582                               | <i>S. cerevisiae</i>              | <i>IMA5</i>                          | 97.25                     |
| <i>WeihenMALS-E</i>                                              | 586                               | <i>S. eubayanus</i> <sup>S</sup>  | <i>SeubMALS</i>                      | 95.21                     |
| <i>WeihenIMA-CB</i>                                              | 582                               | inconclusive                      | <i>IMA5</i>                          | 87.78                     |
| <i>tWeihenIMA-CC</i>                                             | 198                               | <i>S. cerevisiae</i>              | <i>IMA1</i>                          | 99.49                     |
| <i>tWeihenIMA-CD</i>                                             | 198                               | <i>S. cerevisiae</i>              | <i>IMA1</i>                          | 99.49                     |
| <i>tWeihenIMA-CE</i>                                             | 198                               | <i>S. cerevisiae</i>              | <i>IMA1 (Ale)</i>                    | 86.8 (>97) <sup>^</sup>   |
| <i>tWeihenIMA-EA</i>                                             | 264                               | <i>S. eubayanus</i> <sup>S</sup>  | <i>SeubIMA-A</i>                     | 96.98                     |
| Regulators                                                       | Length (aa)                       | Likely Origin                     | Closest homolog                      | Identity (%) <sup>a</sup> |
| <i>tWeihenMAL63-C</i>                                            | 460                               | <i>S. cerevisiae</i>              | <i>MAL63 (Ale)</i>                   | 81.96 (>98) <sup>^</sup>  |
| <i>WeihenMAL33-C</i>                                             | 471                               | <i>S. cerevisiae</i>              | <i>MAL33</i>                         | 91.24 (>99) <sup>^</sup>  |
| <i>WeihenMAL33B-EA</i>                                           | 478                               | inconclusive                      | <i>SeubMAL33B</i>                    | 71.79                     |
| <i>WeihenMAL13-C</i> <sup>I</sup>                                | 474                               | <i>S. cerevisiae</i>              | <i>MAL13</i>                         | 100                       |
| <i>WeihenMAL33B-EB</i> <sup>I</sup>                              | 499                               | <i>S. eubayanus</i> <sup>S</sup>  | <i>SeubMAL33B</i>                    | 86.75                     |

t – truncated sequence

<sup>I</sup> likely to be inactivated

<sup>M</sup> previously identified as a maltotriose transporter

<sup>H</sup> *S. cerevisiae* homolog can transport maltotriose

<sup>S</sup> origin supported by synteny

<sup>a</sup> based on amino acid and corrected for frameshift if necessary

<sup>^</sup> based on comparison to Foster's O and Foster's B base pair sequence

**Table S3**

WU-BLAST results and amino acid alignment of *MTT1*-like sequences from non-S288c strains of *S. cerevisiae*

| S. cerevisiae strain | amino acid ID to <i>MTT1</i> <sup>a</sup> | E-value | From WU-BLAST                          |                |                                        | start  | end                                                   | Strain Description <sup>b</sup>                                                                                                                                                                                                                                                                                                                                        | Notes |
|----------------------|-------------------------------------------|---------|----------------------------------------|----------------|----------------------------------------|--------|-------------------------------------------------------|------------------------------------------------------------------------------------------------------------------------------------------------------------------------------------------------------------------------------------------------------------------------------------------------------------------------------------------------------------------------|-------|
|                      |                                           |         | Location (contig/scaffold accession #) | ID (%)         | Location (contig/scaffold accession #) |        |                                                       |                                                                                                                                                                                                                                                                                                                                                                        |       |
| T7                   | 96.42                                     | 0       | 95                                     | AFDE01000045.1 | 83091                                  | 84938  | Missouri oak tree exudate isolate.                    | Extracted sequence is reverse complement of <i>MTT1</i> .                                                                                                                                                                                                                                                                                                              |       |
| DBVPG6044            | 96.09                                     | 0       | 95                                     | JRIG01000448.1 | 8583                                   | 10430  | Haploid derivative of West African bili wine isolate. | Extracted sequence is reverse complement of <i>MTT1</i> . In order to put the sequence into frame what is likely an extra A was removed from a poly A tract and a likely missing T in a poly T tract put in. This modified sequence still has an early stop codon.                                                                                                     |       |
| YPS163               | 91.38 (overall)                           | 0       | 95                                     | JRIC01000169.1 | 81                                     | 1964   | Pennsylvania woodland isolate.                        | Part of the end of this sequence is obscured by poor sequence (a tract of N's). When the part before this is translated and aligned to <i>MTT1</i> the percent ID is 96.32%, while for the remaining sequence after the obscured portion the percent ID for the translated sequence is 92.86%.                                                                         |       |
| Sigma1278b           | 95.12                                     | 0       | 94                                     | ACVY01000024.1 | 161442                                 | 163289 | Laboratory strain.                                    | Extracted sequence is reverse complement of <i>MTT1</i> .                                                                                                                                                                                                                                                                                                              |       |
| SK1                  | 96.31                                     | 0       | 95                                     | JRIH01000332.1 | 1265                                   | 2975   | Laboratory strain.                                    | Sequence is incomplete because the contig ends. Like DBVPG6044, in order to put the sequence into frame what is likely an extra A in a poly A tract was removed and a likely missing T from a poly tract put in. This modified sequence also still has an early stop codon.                                                                                            |       |
| FL100                | 93.2                                      | 0       | 94                                     | JRIT01000039.1 | 100613                                 | 102381 | Laboratory strain.                                    | Extracted sequence is reverse complement of <i>MTT1</i> . Part of the end of this sequence is obscured by poor sequence (a tract of N's). When the translated sequences before the poor sequence is aligned to <i>MTT1</i> the percent ID is 94.69%, while for the remaining sequence after the obscured portion the percent ID for the translated sequence is 92.86%. |       |

Nucleotide sequence of *MTT1* from lager yeast of the Froberg lineage (strain W34/70) used as WU-BLAST query sequence against "OTHER S. cerevisiae STRAINS: GENOMIC SEQUENCE" database in *Saccharomyces* Genome Database ([www.yeastgenome.org](http://www.yeastgenome.org)) on 5-12-2015.

<sup>a</sup>pairwise alignment with *MTT1* WS34/70 in MUSCLE

<sup>b</sup>description from *Saccharomyces* Genome Database (<http://www.yeastgenome.org/download-data/sequence>)

**Table S4**

Number of synonymous substitutions in the *S. eubayanus* vs. *S. cerevisiae* subgenomes of lager-brewing yeasts

| Lineage  | Total # of synonymous sites | sites with synonymous substitutions in <i>S. eubayanus</i> subgenome of lager-brewing yeasts |                     |                                  | sites with synonymous substitutions in <i>S. cerevisiae</i> subgenome of lager-brewing yeasts |                     |                                  |
|----------|-----------------------------|----------------------------------------------------------------------------------------------|---------------------|----------------------------------|-----------------------------------------------------------------------------------------------|---------------------|----------------------------------|
|          |                             | total # of substitutions                                                                     | proportion of sites | 99% binomial confidence interval | total # of substitutions                                                                      | proportion of sites | 99% binomial confidence interval |
| Saaz     | 2310707                     | 194                                                                                          | 8.40E-05            | (6.924e-5, 0.0001008)            | 2240                                                                                          | 9.69E-04            | (0.0009175, 0.001023)            |
| Froberg  | 2310707                     | 191                                                                                          | 8.27E-05            | (6.807e-5, 9.935e-5)             | 1919                                                                                          | 8.31E-04            | (0.0007825, 0.0008805)           |
| combined | 2310707                     | 385                                                                                          | 1.67E-04            | (0.0001456, 0.0001898)           | 4159                                                                                          | 1.80E-03            | (0.001729, 0.001873)             |

**Table S5**

BOWTIE2 mapping for placement of unplaced scaffolds

| unplaced scaffold               | unplaced contig | scaffold-possible placement     | contig-possible placements | mate support count>100 |
|---------------------------------|-----------------|---------------------------------|----------------------------|------------------------|
| <i>MALψ</i> cluster scaffold_18 | contig_140      | chrII-L                         | contig_1                   | 450                    |
|                                 |                 | chrII-L                         | contig_2                   | 350                    |
|                                 |                 | chrXIII-R                       | contig_40                  | 292                    |
|                                 |                 | chrXIII-R                       | contig_42                  | 230                    |
|                                 |                 | self                            | contig_140                 | 7248                   |
|                                 |                 | FRE cluster(scaffold_19)        | contig_141                 | 506                    |
|                                 |                 | fully contained in conitg_141   | contig_142                 | 496                    |
| <i>FRE</i> cluster scaffold_19  | contig_141      | chrXV-R                         | contig_62                  | 571                    |
|                                 |                 | <i>MAL</i> cluster(scaffold_18) | contig_140                 | 506                    |
|                                 |                 | self                            | contig_141                 | 2899                   |
|                                 |                 | fully contained in conitg_141   | contig_142                 | 112                    |
| <i>PEP1</i> scaffold_21         | contig_143      | chrII                           | contig_3                   | 292                    |
|                                 |                 | chrII                           | contig_4                   | 266                    |
|                                 |                 | chrXIV                          | contig_67                  | 231                    |
|                                 |                 | chrXIV                          | contig_68                  | 420                    |
|                                 |                 | self                            | contig_143                 | 1994                   |
| <i>PPH22</i> scaffold_25        | contig_147      | chrIV                           | contig_37                  | 402                    |
|                                 |                 | chrIV                           | contig_38                  | 343                    |
|                                 |                 | self                            | contig_147                 | 1251                   |
| <i>GAL2</i> scaffold_28         | contig_150      | chrXII                          | contig_109                 | 321                    |
|                                 |                 | chrXII                          | contig_111                 | 360                    |
|                                 |                 | self                            | contig_150                 | 1035                   |

**Table S6**

Mate-pair support matrix for unplaced contigs and their possible placements

|            | contig_1 | contig_2 | contig_3 | contig_4 | contig_37 | contig_38 | contig_40 | contig_42 | contig_62 | contig_67 | contig_68 | contig_109 | contig_111 | contig_140 | contig_141 | contig_142 | contig_143 | contig_147 | contig_150 |
|------------|----------|----------|----------|----------|-----------|-----------|-----------|-----------|-----------|-----------|-----------|------------|------------|------------|------------|------------|------------|------------|------------|
| contig_1   | 3835     | 456      | 0        | 0        | 0         | 0         | 4         | 9         | 1         | 0         | 0         | 0          | 0          | 450        | 25         | 8          | 0          | 0          | 0          |
| contig_2   | 456      | 51420    | 1008     | 0        | 3         | 6         | 0         | 0         | 7         | 0         | 6         | 9          | 2          | 350        | 12         | 1          | 0          | 0          | 0          |
| contig_3   | 0        | 1008     | 20263    | 98       | 2         | 1         | 0         | 0         | 0         | 43        | 72        | 3          | 4          | 0          | 0          | 0          | 292        | 0          | 0          |
| contig_4   | 0        | 0        | 98       | 5645     | 0         | 0         | 0         | 0         | 2         | 86        | 85        | 0          | 1          | 0          | 0          | 0          | 266        | 0          | 0          |
| contig_37  | 0        | 3        | 2        | 0        | 39615     | 596       | 3         | 0         | 8         | 0         | 5         | 2          | 1          | 0          | 1          | 0          | 0          | 402        | 0          |
| contig_38  | 0        | 6        | 1        | 0        | 596       | 32829     | 0         | 0         | 1         | 0         | 8         | 3          | 5          | 1          | 0          | 0          | 0          | 343        | 0          |
| contig_40  | 4        | 0        | 0        | 0        | 3         | 0         | 11711     | 2         | 0         | 0         | 0         | 3          | 0          | 292        | 1          | 0          | 0          | 0          | 0          |
| contig_42  | 9        | 0        | 0        | 0        | 0         | 0         | 2         | 3660      | 0         | 0         | 0         | 0          | 1          | 230        | 0          | 0          | 0          | 0          | 0          |
| contig_62  | 1        | 7        | 0        | 2        | 8         | 1         | 0         | 0         | 46169     | 1         | 9         | 6          | 3          | 10         | 571        | 604        | 0          | 0          | 0          |
| contig_67  | 0        | 0        | 43       | 86       | 0         | 0         | 0         | 0         | 1         | 3835      | 251       | 0          | 0          | 0          | 0          | 0          | 231        | 0          | 0          |
| contig_68  | 0        | 6        | 72       | 85       | 5         | 8         | 0         | 0         | 9         | 251       | 80556     | 15         | 8          | 0          | 1          | 0          | 420        | 0          | 0          |
| contig_109 | 0        | 9        | 3        | 0        | 2         | 3         | 3         | 0         | 6         | 0         | 15        | 71823      | 288        | 1          | 0          | 0          | 0          | 0          | 321        |
| contig_111 | 0        | 2        | 4        | 1        | 1         | 5         | 0         | 1         | 3         | 0         | 8         | 288        | 53586      | 0          | 1          | 0          | 0          | 0          | 360        |
| contig_140 | 450      | 350      | 0        | 0        | 0         | 1         | 292       | 230       | 10        | 0         | 0         | 1          | 0          | 7248       | 506        | 496        | 0          | 0          | 0          |
| contig_141 | 25       | 12       | 0        | 0        | 1         | 0         | 1         | 0         | 571       | 0         | 1         | 0          | 1          | 506        | 2899       | 112        | 0          | 0          | 0          |
| contig_142 | 8        | 1        | 0        | 0        | 0         | 0         | 0         | 0         | 604       | 0         | 0         | 0          | 0          | 496        | 112        | 2901       | 0          | 0          | 0          |
| contig_143 | 0        | 0        | 292      | 266      | 0         | 0         | 0         | 0         | 0         | 231       | 420       | 0          | 0          | 0          | 0          | 0          | 1994       | 0          | 0          |
| contig_147 | 0        | 0        | 0        | 0        | 402       | 343       | 0         | 0         | 0         | 0         | 0         | 0          | 0          | 0          | 0          | 0          | 0          | 1251       | 0          |
| contig_150 | 0        | 0        | 0        | 0        | 0         | 0         | 0         | 0         | 0         | 0         | 0         | 321        | 360        | 0          | 0          | 0          | 0          | 0          | 1035       |

|                             |
|-----------------------------|
| self pairing                |
| 0 mate-pair support         |
| 0 < mate-pair support < 100 |
| mate-pair support > 100     |
